# Supplementary material for: Yeast techniques for modeling drugs targeting Bcl-2 and caspase family members
Source: PubMed Central journal article supplement — Cell Death Dis. 2013 May 2;4(5):e619–. doi: 10.1038/cddis.2013.143 (PMC3674352; doi:10.1038/cddis.2013.143), 2013-05-02
Supplement: cddis2013143x2.pdf [file cddis2013143x2.pdf]

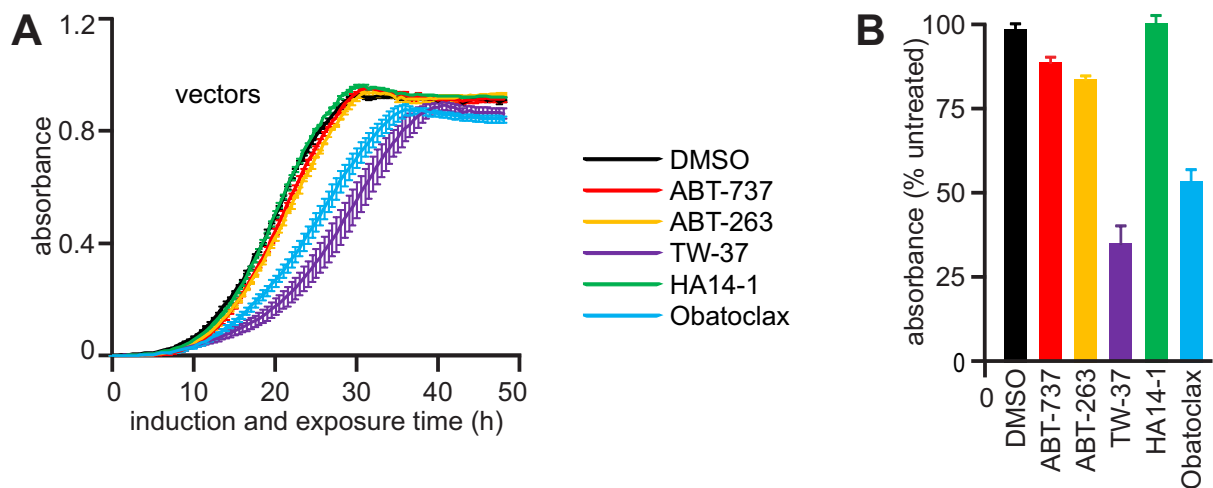

**Supplementary Figure 1.** TW-37 and Obatoclax mesylate impair yeast growth in liquid medium. FYAK 26/8-10B1 yeast (mutant for *pdr5*, *snq2* and *yor1*) bearing empty vectors were grown in raffinose-containing medium then transferred into media containing galactose plus 30  $\mu$ M of the indicated drugs in 3% DMSO, or DMSO alone. (A) The absorbance of each culture was measured every 0.5 h for 48 h. (B) The graph depicts the average absorbance of three clones treated with each drug, at the time when the absorbance of each untreated clone (grown in DMSO alone) was closest to 0.5. (A, B) Error bars indicate standard errors of the means from analyses of three independent clones.
